# Supplementary material for: Potential to Improve Therapy of Chronic Myeloid Leukemia (CML), Especially for Patients with Older Age: Incidence, Mortality, and Survival Rates of Patients with CML in Switzerland from 1995 to 2017
Source: MDPI journal article supplement (doi:10.3390/cancers13246269), 2021-12-14
Supplement: s1 [file s1]

# Supplementary materials: Potential to Improve Therapy of Chronic Myeloid Leukemia (CML), Especially for Patients with Older Age: Incidence, Mortality, and Survival Rates of Patients with CML in Switzerland from 1995 to 2017

Michael Daskalakis, Anita Feller, Jasmine Noetzli, Nicolas Bonadies, Volker Arndt, Gabriela Maria Baerlocher and the NICER Working Group

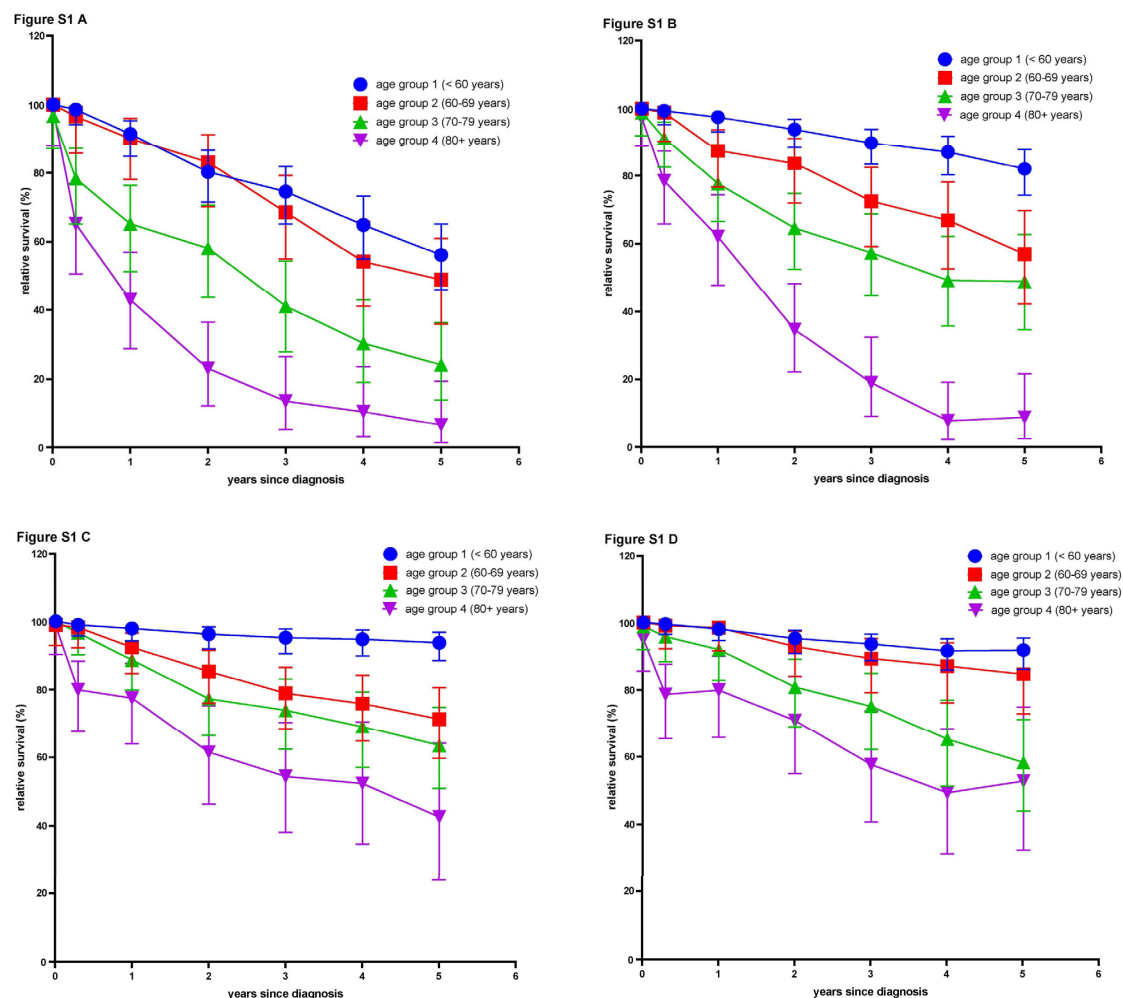

**Figure S1.** Relative survival time of CML patients in Swiss CCRs grouped by age and time periods: (A), relative survival time of CML patients in Swiss CCR of time period 1 (1995–2000); (B), relative survival time of CML patients in Swiss CCR of time period 2 (2001–2006); (C), relative survival time of CML patients in Swiss CCR of time period 3 (2007–2012); (D), relative survival time of CML patients in Swiss CCR of time period 4 (2013–2017).

**Table S1:** Incidence of CML, 1995–2000, 2001–2006, 2007–2012, and 2013–2017.

| Variation         | 1995–2000     |             |                         | 2001–2006     |             |                         | 2007–2012     |             |                         | 2013–2017     |             |                         |
|-------------------|---------------|-------------|-------------------------|---------------|-------------|-------------------------|---------------|-------------|-------------------------|---------------|-------------|-------------------------|
|                   | Annual Cases* | CIR         | ASR (95% CI)            | Annual Cases* | CIR         | ASR (95% CI)            | Annual Cases* | CIR         | ASR (95% CI)            | Annual Cases* | CIR         | ASR (95% CI)            |
| Incidence Overall |               |             |                         |               |             |                         |               |             |                         |               |             |                         |
| Males             | <b>54</b>     | <b>1.57</b> | <b>1.44 (1.23–1.66)</b> | <b>59</b>     | <b>1.66</b> | <b>1.42 (1.23–1.62)</b> | <b>57</b>     | <b>1.49</b> | <b>1.23 (1.07–1.40)</b> | <b>61</b>     | <b>1.48</b> | <b>1.23 (1.09–1.39)</b> |
| <60 years         | 27            | 0.95        | 0.90 (0.72–1.10)        | 24            | 0.83        | 0.74 (0.59–0.92)        | 22            | 0.72        | 0.66 (0.53–0.81)        | 29            | 0.91        | 0.81 (0.68–0.97)        |
| 60–69 years       | 7             | 2.35        | 2.36 (1.52–3.48)        | 10            | 2.87        | 2.87 (2.00–3.99)        | 11            | 2.62        | 2.62 (1.89–3.54)        | 12            | 2.79        | 2.77 (2.08–3.62)        |
| 70–79 years       | 12            | 5.84        | 5.90 (4.22–8.04)        | 15            | 6.92        | 6.91 (5.19–9.02)        | 14            | 5.62        | 5.48 (4.13–7.14)        | 12            | 4.18        | 4.20 (3.15–5.48)        |
| 80+ years         | 8             | 8.99        | 8.70 (5.75–12.64))      | 10            | 9.54        | 9.46 (6.59–13.17)       | 11            | 8.32        | 8.32 (5.98–11.29)       | 7             | 4.67        | 4.57 (3.09–6.51)        |
| Females           | <b>39</b>     | <b>1.09</b> | <b>0.82 (0.68–0.99)</b> | <b>49</b>     | <b>1.31</b> | <b>0.97 (0.82–1.14)</b> | <b>41</b>     | <b>1.03</b> | <b>0.80 (0.68–0.94)</b> | <b>42</b>     | <b>1.01</b> | <b>0.75 (0.64–0.88)</b> |
| <60 years         | 15            | 0.53        | 0.49 (0.36–0.64)        | 17            | 0.60        | 0.54 (0.41–0.69)        | 16            | 0.55        | 0.49 (0.37–0.62)        | 18            | 0.59        | 0.51 (0.41–0.64)        |
| 60–69 years       | 8             | 2.22        | 2.22 (1.46–3.23)        | 11            | 2.83        | 2.81 (1.99–3.86)        | 10            | 2.40        | 2.38 (1.71–3.23)        | 8             | 1.68        | 1.67 (1.15–2.33)        |
| 70–79 years       | 6             | 2.24        | 2.11 (1.32–3.21)        | 9             | 3.18        | 3.16 (2.18–4.42)        | 8             | 2.60        | 2.51 (1.71–3.56)        | 7             | 2.04        | 2.01 (1.36–2.86)        |
| 80+ years         | 10            | 5.48        | 5.49 (3.87–7.57)        | 12            | 5.45        | 5.46 (3.94–7.38)        | 6             | 2.60        | 2.59 (1.68–3.82)        | 9             | 3.47        | 3.48 (2.49–4.75)        |
| Total             | <b>93</b>     | <b>1.33</b> | <b>1.10 (0.98–1.24)</b> | <b>108</b>    | <b>1.48</b> | <b>1.17 (1.05–1.29)</b> | <b>98</b>     | <b>1.26</b> | <b>0.99 (0.89–1.10)</b> | <b>103</b>    | <b>1.24</b> | <b>0.99 (0.90–1.09)</b> |

|             |    |      |                  |    |      |                  |    |      |                  |    |      |                  |
|-------------|----|------|------------------|----|------|------------------|----|------|------------------|----|------|------------------|
| <60 years   | 42 | 0.74 | 0.69 (0.58–0.82) | 41 | 0.72 | 0.64 (0.54–0.75) | 38 | 0.64 | 0.57 (0.49–0.67) | 48 | 0.75 | 0.67 (0.58–0.76) |
| 60–69 years | 15 | 2.28 | 2.28 (1.71–3.00) | 20 | 2.85 | 2.84 (2.23–3.58) | 21 | 2.51 | 2.50 (1.99–3.10) | 20 | 2.22 | 2.21 (1.77–2.72) |
| 70–79 years | 18 | 3.72 | 3.70 (2.84–4.75) | 25 | 4.76 | 4.75 (3.80–5.86) | 22 | 3.94 | 3.81 (3.05–4.71) | 19 | 3.02 | 3.03 (2.42–3.75) |
| 80+ years   | 19 | 6.59 | 6.55 (5.05–8.35) | 22 | 6.80 | 6.82 (5.39–8.52) | 17 | 4.56 | 4.56 (3.54–5.79) | 16 | 3.9  | 3.90 (3.04–4.92) |

\* Incidence: mean annual case frequency extrapolated to the whole Swiss population from cases observed in the cancer registries. Discrepancies between the sum and total number of expected cases are caused by rounding errors. CIR: crude rates per 100'000 py. ASR: age-standardized incidence-rates per 100,000 py (old European standard).

**Table S2:** Mortality of CML, 1995–2000, 2001–2006, 2007–2012, and 2013–2017.

| Variation         | 1995–2000     |      |                   | 2001–2006     |      |                   | 2007–2012     |      |                   | 2013–2017     |      |                  |
|-------------------|---------------|------|-------------------|---------------|------|-------------------|---------------|------|-------------------|---------------|------|------------------|
|                   | Annual Cases* | CR   | ASR (95% CI)      | Annual Cases* | CR   | ASR (95% CI)      | Annual Cases* | CR   | ASR (95% CI)      | Annual Cases* | CR   | ASR (95% CI)     |
| Mortality Overall |               |      |                   |               |      |                   |               |      |                   |               |      |                  |
| Males             | 38            | 1.09 | 1.00 (0.87–1.14)  | 27            | 0.75 | 0.61 (0.52–0.71)  | 27            | 0.70 | 0.51 (0.44–0.60)  | 18            | 0.44 | 0.30 (0.24–0.37) |
| <60 years         | 12            | 0.43 | 0.42 (0.33–0.52)  | 5             | 0.16 | 0.15 (0.10–0.21)  | 2             | 0.07 | 0.06 (0.03–0.11)  | 2             | 0.07 | 0.06 (0.03–0.11) |
| 60–69 years       | 8             | 2.68 | 2.67 (1.97–3.53)  | 4             | 1.07 | 1.08 (0.67–1.63)  | 5             | 1.10 | 1.10 (0.73–1.60)  | 3             | 0.68 | 0.67 (0.37–1.10) |
| 70–79 years       | 9             | 4.35 | 4.32 (3.2–5.67)   | 9             | 4.16 | 4.10 (3.09–5.34)  | 9             | 3.72 | 3.62 (2.73–4.72)  | 4             | 1.51 | 1.49 (0.93–2.26) |
| 80+ years         | 9             | 9.59 | 9.75 (7.25–12.84) | 9             | 8.74 | 9.32 (7.01–12.13) | 11            | 8.61 | 8.99 (6.93–11.45) | 8             | 5.44 | 5.58 (3.99–7.58) |
| Females           | 34            | 0.93 | 0.64 (0.55–0.74)  | 25            | 0.67 | 0.42 (0.35–0.50)  | 16            | 0.40 | 0.21 (0.16–0.26)  | 13            | 0.31 | 0.13 (0.10–0.18) |
| <60 years         | 8             | 0.28 | 0.26 (0.19–0.35)  | 4             | 0.13 | 0.12 (0.08–0.19)  | 1             | 0.02 | 0.02 (0.01–0.05)  | 1             | 0.03 | 0.02 (0.01–0.06) |
| 60–69 years       | 6             | 1.83 | 1.80 (1.27–2.47)  | 5             | 1.26 | 1.25 (0.83–1.81)  | 3             | 0.62 | 0.62 (0.36–1.01)  | 1             | 0.22 | 0.21 (0.07–0.50) |

|             |           |             |                         |           |             |                         |           |             |                         |           |             |                         |
|-------------|-----------|-------------|-------------------------|-----------|-------------|-------------------------|-----------|-------------|-------------------------|-----------|-------------|-------------------------|
| 70–79 years | 8         | 2.67        | 2.59 (1.88–3.47)        | 7         | 2.18        | 2.08 (1.47–2.85)        | 4         | 1.35        | 1.30 (0.84–1.93)        | 2         | 0.52        | 0.49 (0.22–0.94)        |
| 80+ years   | 12        | 6.28        | 6.28 (4.91–7.91)        | 10        | 4.76        | 4.77 (3.65–6.13)        | 8         | 3.45        | 3.45 (2.56–4.55)        | 9         | 3.59        | 3.54 (2.60–4.71)        |
| Total       | <b>72</b> | <b>1.01</b> | <b>0.80 (0.72–0.88)</b> | <b>52</b> | <b>0.71</b> | <b>0.49 (0.43–0.55)</b> | <b>43</b> | <b>0.55</b> | <b>0.33 (0.29–0.38)</b> | <b>31</b> | <b>0.37</b> | <b>0.21 (0.17–0.25)</b> |
| <60 years   | 20        | 0.35        | 0.34 (0.28–0.41)        | 9         | 0.15        | 0.13 (0.10–0.18)        | 3         | 0.05        | 0.04 (0.02–0.07)        | 3         | 0.05        | 0.04 (0.02–0.07)        |
| 60–69 years | 15        | 2.23        | 2.21 (1.77–2.72)        | 8         | 1.17        | 1.17 (0.87–1.54)        | 7         | 0.86        | 0.86 (0.62–1.15)        | 4         | 0.45        | 0.43 (0.27–0.67)        |
| 70–79 years | 16        | 3.37        | 3.31 (2.68–4.04)        | 16        | 3.03        | 2.94 (2.37–3.60)        | 13        | 2.40        | 2.32 (1.84–2.89)        | 6         | 0.97        | 0.95 (0.64–1.35)        |
| 80+ years   | 21        | 7.34        | 7.38 (6.13–8.80)        | 20        | 6.09        | 6.19 (5.12–7.42)        | 19        | 5.24        | 5.27 (4.36–6.32)        | 18        | 4.26        | 4.28 (3.43–5.28)        |

---

\* Mortality: mean annual case frequency derived from nationwide cause of death statistics. Discrepancies between the sum and total number of expected cases are caused by rounding errors. CR: crude rates of mortality per 100'000 py. ASR: age-standardized mortality-rates per 100,000 py (old European standard).

**Table S3:** OS and RS at 5 years of CML patients in the Swiss CCR.

| Time Period | Age Group | Observed Survival (%) | Relative Survival (%) | 95% CI Lower Limit | 95% CI Upper Limit | Standard Error RS (%) |
|-------------|-----------|-----------------------|-----------------------|--------------------|--------------------|-----------------------|
| 1995–2000   | all ages  | 32.4                  | 35.7                  | 29.8               | 41.6               | 3.0                   |
| 2001–2006   | all ages  | 48.9                  | 53.2                  | 46.6               | 59.3               | 3.3                   |
| 2007–2012   | all ages  | 64.1                  | 70.7                  | 64.8               | 75.8               | 2.8                   |
| 2013–2017   | all ages  | 67.7                  | 74.4                  | 67.6               | 80.0               | 3.2                   |
| 1995–2000   | <60       | 55.3                  | 56.1                  | 46.0               | 65.2               | 4.9                   |
| 2001–2006   | <60       | 81.0                  | 82.1                  | 74.2               | 87.8               | 3.4                   |
| 2007–2012   | <60       | 92.8                  | 93.8                  | 88.6               | 96.9               | 2.0                   |
| 2013–2017   | <60       | 90.9                  | 91.9                  | 86.2               | 95.5               | 2.3                   |
| 1995–2000   | 60–69     | 45.5                  | 48.8                  | 35.9               | 60.9               | 6.5                   |
| 2001–2006   | 60–69     | 53.8                  | 57.0                  | 42.2               | 69.8               | 7.1                   |
| 2007–2012   | 60–69     | 67.8                  | 71.3                  | 59.7               | 80.6               | 5.3                   |
| 2013–2017   | 60–69     | 80.7                  | 84.7                  | 72.9               | 92.5               | 4.9                   |
| 1995–2000   | 70–79     | 19.7                  | 24.2                  | 14.1               | 36.3               | 5.8                   |
| 2001–2006   | 70–79     | 40.8                  | 48.9                  | 34.7               | 62.7               | 7.3                   |
| 2007–2012   | 70–79     | 54.3                  | 63.6                  | 51.0               | 74.7               | 6.1                   |
| 2013–2017   | 70–79     | 50.8                  | 58.3                  | 43.9               | 71.2               | 7.0                   |
| 1995–2000   | 80+       | 3.5                   | 6.8                   | 1.4                | 19.4               | 4.4                   |
| 2001–2006   | 80+       | 5.2                   | 8.9                   | 2.5                | 21.6               | 4.8                   |
| 2007–2012   | 80+       | 24.3                  | 42.6                  | 23.8               | 64.2               | 10.6                  |
| 2013–2017   | 80+       | 30.2                  | 52.8                  | 32.3               | 74.9               | 11.1                  |

**Table S4.** Significance of 5yrs RS of CML patients in the Swiss CCR.

| All<br>Ages | z      | p-<br>Value | <60<br>years | z      | p-<br>Value | 60–69<br>Years | z      | p-<br>Value | 70–79<br>Years | p-<br>Value | 80+<br>Years | z         | p-<br>Value |       |
|-------------|--------|-------------|--------------|--------|-------------|----------------|--------|-------------|----------------|-------------|--------------|-----------|-------------|-------|
| t1 vs. t2   | 3.9335 | <0.001      | t1 vs. t2    | 4.3226 | <0.001      | t1 vs. t2      | 0.8486 | 0.396       | t1 vs. t2      | 2.6677      | 0.008        | t1 vs. t2 | 0.3232      | 0.747 |
| t2 vs. t3   | 4.0669 | <0.001      | t2 vs. t3    | 2.9292 | 0.003       | t2 vs. t3      | 1.6123 | 0.107       | t2 vs. t3      | 1.5395      | 0.124        | t2 vs. t3 | 2.9075      | 0.004 |
| t3 vs. t4   | 0.8807 | 0.378       | t3 vs. t4    | 0.6209 | 0.535       | t3 vs. t4      | 1.8401 | 0.066       | t3 vs. t4      | 0.5611      | 0.575        | t3 vs. t4 | 0.6716      | 0.502 |

**Table S5.** Summary of other population-based CML studies.

| Study                                                                | Registry/Database                                                  | Observati<br>on Time | No. of<br>CML pts. | Relative Survival–5 Years |                      |                      |                      |                      |
|----------------------------------------------------------------------|--------------------------------------------------------------------|----------------------|--------------------|---------------------------|----------------------|----------------------|----------------------|----------------------|
| <sup>1</sup> Daskalakis et al., Swiss NICER<br>CML study group [1]   | CH, NACR                                                           | 1995–2014            | 1236               |                           |                      | 0.35 (1995–<br>2000) | 0.52 (2001–<br>2006) | 0.68 (2007–<br>2014) |
| <sup>2</sup> Chen Y et al., Leuk Lymphoma<br>2013 July [2]           | US, SEER–9–registries<br>database                                  | 1975–2009            | 11888              | 0.26 (1975–<br>1989)      |                      | 0.36 (1990–<br>2000) | 0.56 (2001–<br>2009) |                      |
| <sup>3</sup> Roman E et al., Cancer Epidemiol<br>2016 Jun [3]        | UK, Haematological<br>Malignancy Research<br>Network               | 2004–2013            | 318                |                           |                      |                      |                      | 0.90 (2004–<br>2015) |
| <sup>4</sup> Smith AG et al., BMJ Open 2014<br>Jan [4]               | UK, Haematological<br>Malignancy Research<br>Network               | 2004–2011            | 242                |                           |                      |                      | 0.89 (2004–<br>2011) |                      |
| <sup>5</sup> Beinortas T et al., BMC Cancer<br>2016 Mar [5]          | Lithuania, National<br>Haematological Disease<br>Monitoring System | 2000–2013            | 601                |                           |                      | 0.33 (2000–<br>2004) | 0.55 (2005–<br>2009) | NR (2010–<br>2013)   |
| <sup>6</sup> Thielen N et al., Europ J Haematol<br>2016 Aug [6]      | Netherland Cancer Registry                                         | 1989–2012            | 3585               |                           |                      | 0.36 (1989–<br>2000) | 0.69 (2001–<br>2006) | 0.79 (2007–<br>2012) |
| <sup>7</sup> Penot A et al., Leuk Lymphoma<br>2015 Jun [7]           | France, 5 Cancer Registries                                        | 1980–2009            | 781                | 0.44 (1980–<br>1986)      |                      | 0.64 (1987–<br>1999) | 0.89 (2000–<br>2009) |                      |
| <sup>8</sup> Corm S et al., Blood 2011 Okt [8]                       | France, CML–Registry of<br>Nord–Pas de Calais                      | 1990–2007            | 691                |                           |                      | 0.64 (1990–<br>1994) | 0.66 (1995–<br>1999) | 0.88 (2000–<br>2007) |
| <sup>9</sup> Björkholm M et al., JCO June 2011<br>[9]                | Swedish Cancer Registry                                            | 1973–2008            | 3173               | 0.21 (1973–<br>1979)      | 0.23 (1980–<br>1986) | 0.37 (1987–<br>1993) | 0.54 (1994–<br>2000) | 0.80 (2001–<br>2008) |
| <sup>10</sup> Gunnarsson N et al., Europ J<br>Haematol 2016 Oct [10] | Swedish Cancer Registry                                            | 1970–2012            | 1137               | 0.18 (1970)               |                      |                      |                      | 0.82 (2012)          |

<sup>1</sup> RS was estimated using the Ederer–II–method and the period approach. The estimates are age–standardized according to ICSS Standard 1. <sup>2</sup> RS survival was estimated using the Hakulinen–method and the cohort approach. <sup>3</sup> RS survival was estimated using the model–based method of Estéve 1990. <sup>4</sup> RS survival was estimated using the model–based method of Estéve 1990. <sup>5</sup> RS survival was estimated using the Ederer–II–method and the cohort approach. <sup>6</sup> RS was estimated using a cohort approach (estimation method unknown). <sup>7</sup> RS was estimated using a cohort approach (estimation method unknown). <sup>8</sup> RS was estimated using flexible parametric regression models. <sup>9</sup> RS was estimated using the Ederer–II–method and the cohort approach. <sup>10</sup> RS was estimated using the period approach. The RS estimates for the years between 1970 and 2012 were only presented graphically.

## References:

1. Daskalakis, M.; Feller, A.; Noetzli, J.; Bonadies, N.; Arndt, V.; Baerlocher, G.M.; the NICER Working Group. Potential to Improve Therapy of Chronic Myeloid Leukemia (CML), Especially for Patients with Older Age: Incidence, Mortality, and Survival Rates of Patients with CML in Switzerland from 1995–2017. *Cancers* **2021**, *13*, x. <https://doi.org/10.3390/xxxxx>
2. Chen, Y.; Wang, H.; Kantarjian, H.; Cortes, J. Trends in chronic myeloid leukemia incidence and survival in the United States from 1975 to 2009. *Leukemia & lymphoma* **2013**, *54*, 1411–1417, doi:10.3109/10428194.2012.745525.
3. Roman, E.; Smith, A.; Appleton, S.; Crouch, S.; Kelly, R.; Kinsey, S.; Cargo, C.; Patmore, R. Myeloid malignancies in the real-world: Occurrence, progression and survival in the UK's population-based Haematological Malignancy Research Network 2004–15. *Cancer epidemiology* **2016**, *42*, 186–198, doi:10.1016/j.canep.2016.03.011.
4. Smith, A.G.; Painter, D.; Howell, D.A.; Evans, P.; Smith, G.; Patmore, R.; Jack, A.; Roman, E. Determinants of survival in patients with chronic myeloid leukaemia treated in the new era of oral therapy: findings from a UK population-based patient cohort. *BMJ open* **2014**, *4*, e004266, doi:10.1136/bmjopen-2013-004266.
5. Beinortas, T.; Tavoriene, I.; Zvirblis, T.; Gerbutavicius, R.; Jurgutis, M.; Griskevicius, L. Chronic myeloid leukemia incidence, survival and accessibility of tyrosine kinase inhibitors: a report from population-based Lithuanian haematological disease registry 2000–2013. *BMC cancer* **2016**, *16*, 198, doi:10.1186/s12885-016-2238-9.
6. Thielen, N.; Visser, O.; Ossenkoppele, G.; Janssen, J. Chronic myeloid leukemia in the Netherlands: a population-based study on incidence, treatment, and survival in 3585 patients from 1989 to 2012. *European journal of haematology* **2016**, *97*, 145–154, doi:10.1111/ejh.12695.
7. Penot, A.; Preux, P.M.; Le Guyader, S.; Collignon, A.; Herry, A.; Dufour, V.; Monnereau, A.; Woronoff, A.S.; Troussard, X.; Pons, E.; et al. Incidence of chronic myeloid leukemia and patient survival: results of five French population-based cancer registries 1980–2009. *Leukemia & lymphoma* **2015**, *56*, 1771–1777, doi:10.3109/10428194.2014.974046.
8. Corm, S.; Roche, L.; Micol, J.B.; Coiteux, V.; Bossard, N.; Nicolini, F.E.; Iwaz, J.; Preudhomme, C.; Roche-Lestienne, C.; Facon, T.; et al. Changes in the dynamics of the excess mortality rate in chronic phase-chronic myeloid leukemia over 1990–2007: a population study. *Blood* **2011**, *118*, 4331–4337, doi:10.1182/blood-2011-01-330332.
9. Bjorkholm, M.; Ohm, L.; Eloranta, S.; Derolf, A.; Hultcrantz, M.; Sjoberg, J.; Andersson, T.; Hoglund, M.; Richter, J.; Landgren, O.; et al. Success story of targeted therapy in chronic myeloid leukemia: a population-based study of patients diagnosed in Sweden from 1973 to 2008. *Journal of clinical oncology : official journal of the American Society of Clinical Oncology* **2011**, *29*, 2514–2520, doi:10.1200/jco.2011.34.7146.
10. Gunnarsson, N.; Sandin, F.; Hoglund, M.; Stenke, L.; Bjorkholm, M.; Lambe, M.; Olsson-Stromberg, U.; Richter, J.; Sjalander, A. Population-based assessment of chronic myeloid leukemia in Sweden: striking increase in survival and prevalence. *European journal of haematology* **2016**, *97*, 387–392, doi:10.1111/ejh.12743.
